# Supplementary material for: Determination of Cu in bloodviadirect analysis of dried blood spots using high-resolution continuum source graphite furnace atomic absorption spectrometry
Source: Royal Society of Chemistry journal article supplement (doi:10.1039/d1ja00155h), 2021-01-01
Supplement: d1ja00155h1.pdf [file d1ja00155h1.pdf]

### Perkin Elmer 226 and Whatman 903 filter papers test (HemaPEN)

For testing the two filter papers (Perkin Elmer 226 and Whatman 903) supplied by the HemaPEN manufacturer, DBSs were prepared by taking 2.74  $\mu\text{L}$  of the whole blood RMs with a positive displacement micropipette and depositing that volume onto the filter papers. The analyses were carried out as explained in Section 2.4.

**Table S1.** Direct Cu determination in whole blood reference materials *via* HR CS GFAAS using different DBS filter papers. Results are expressed as  $\bar{x} \pm U$ , where  $U = (t_s)/\sqrt{n}$  for a 95% confidence interval. The concentration was calculated taking into account the volume absorbed by the DBS device (n=5).

| <b>Sample</b> | <b>HemaPEN<br/>(Perkin Elmer 226<br/>(mg L<sup>-1</sup>))</b> | <b>HemaPEN<br/>(Whatman 903<br/>(mg L<sup>-1</sup>))</b> |
|---------------|---------------------------------------------------------------|----------------------------------------------------------|
| <b>RM L-1</b> | 0.66 $\pm$ 0.07<br>(RSD = 8%)                                 | 0.65 $\pm$ 0.05<br>(RSD = 6%)                            |
| <b>RM L-2</b> | 1.30 $\pm$ 0.07<br>(RSD = 4%)                                 | 1.35 $\pm$ 0.10<br>(RSD = 6%)                            |
| <b>RM L-3</b> | 2.26 $\pm$ 0.14<br>(RSD = 5%)                                 | 2.48 $\pm$ 0.15<br>(RSD = 5%)                            |
